# Supplementary material for: Calibration of groundwater seepage against the spatial distribution of the stream network to assess catchment-scale hydraulic properties
Source: Copernicus journal article supplement (doi:10.5194/hess-27-3221-2023), 2023-09-08
Supplement: Supplementary file 1 [file hess-27-3221-2023-supplement.zip]

Archive with 2 entries (2 files):
- hess-27-3221-2023-supplement-title-page.pdf
- Supplement_1.gif
