# Supplementary material for: Calibration of groundwater seepage against the spatial distribution of the stream network to assess catchment-scale hydraulic properties
Source: Copernicus journal article supplement (doi:10.5194/hess-27-3221-2023), 2023-09-08
Supplement: Supplementary file 1 [file hess-27-3221-2023-supplement.zip › hess-27-3221-2023-supplement-title-page.pdf]

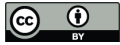

*Supplement of*

## **Calibration of groundwater seepage against the spatial distribution of the stream network to assess catchment-scale hydraulic properties**

**Ronan Abhervé et al.**

*Correspondence to:* Ronan Abhervé (ronan.abherve@univ-rennes.fr, ronan.abherve@unine.ch, ronan.abherve@gmail.com)

- hess-27-3221-2023-supplement-title-page.pdf
- Supplement\_1.gif

The copyright of individual parts of the supplement might differ from the article licence.
