# Supplementary figures and images for: Calibration of groundwater seepage against the spatial distribution of the stream network to assess catchment-scale hydraulic properties
Source: Copernicus journal article supplement (doi:10.5194/hess-27-3221-2023), 2023-09-08

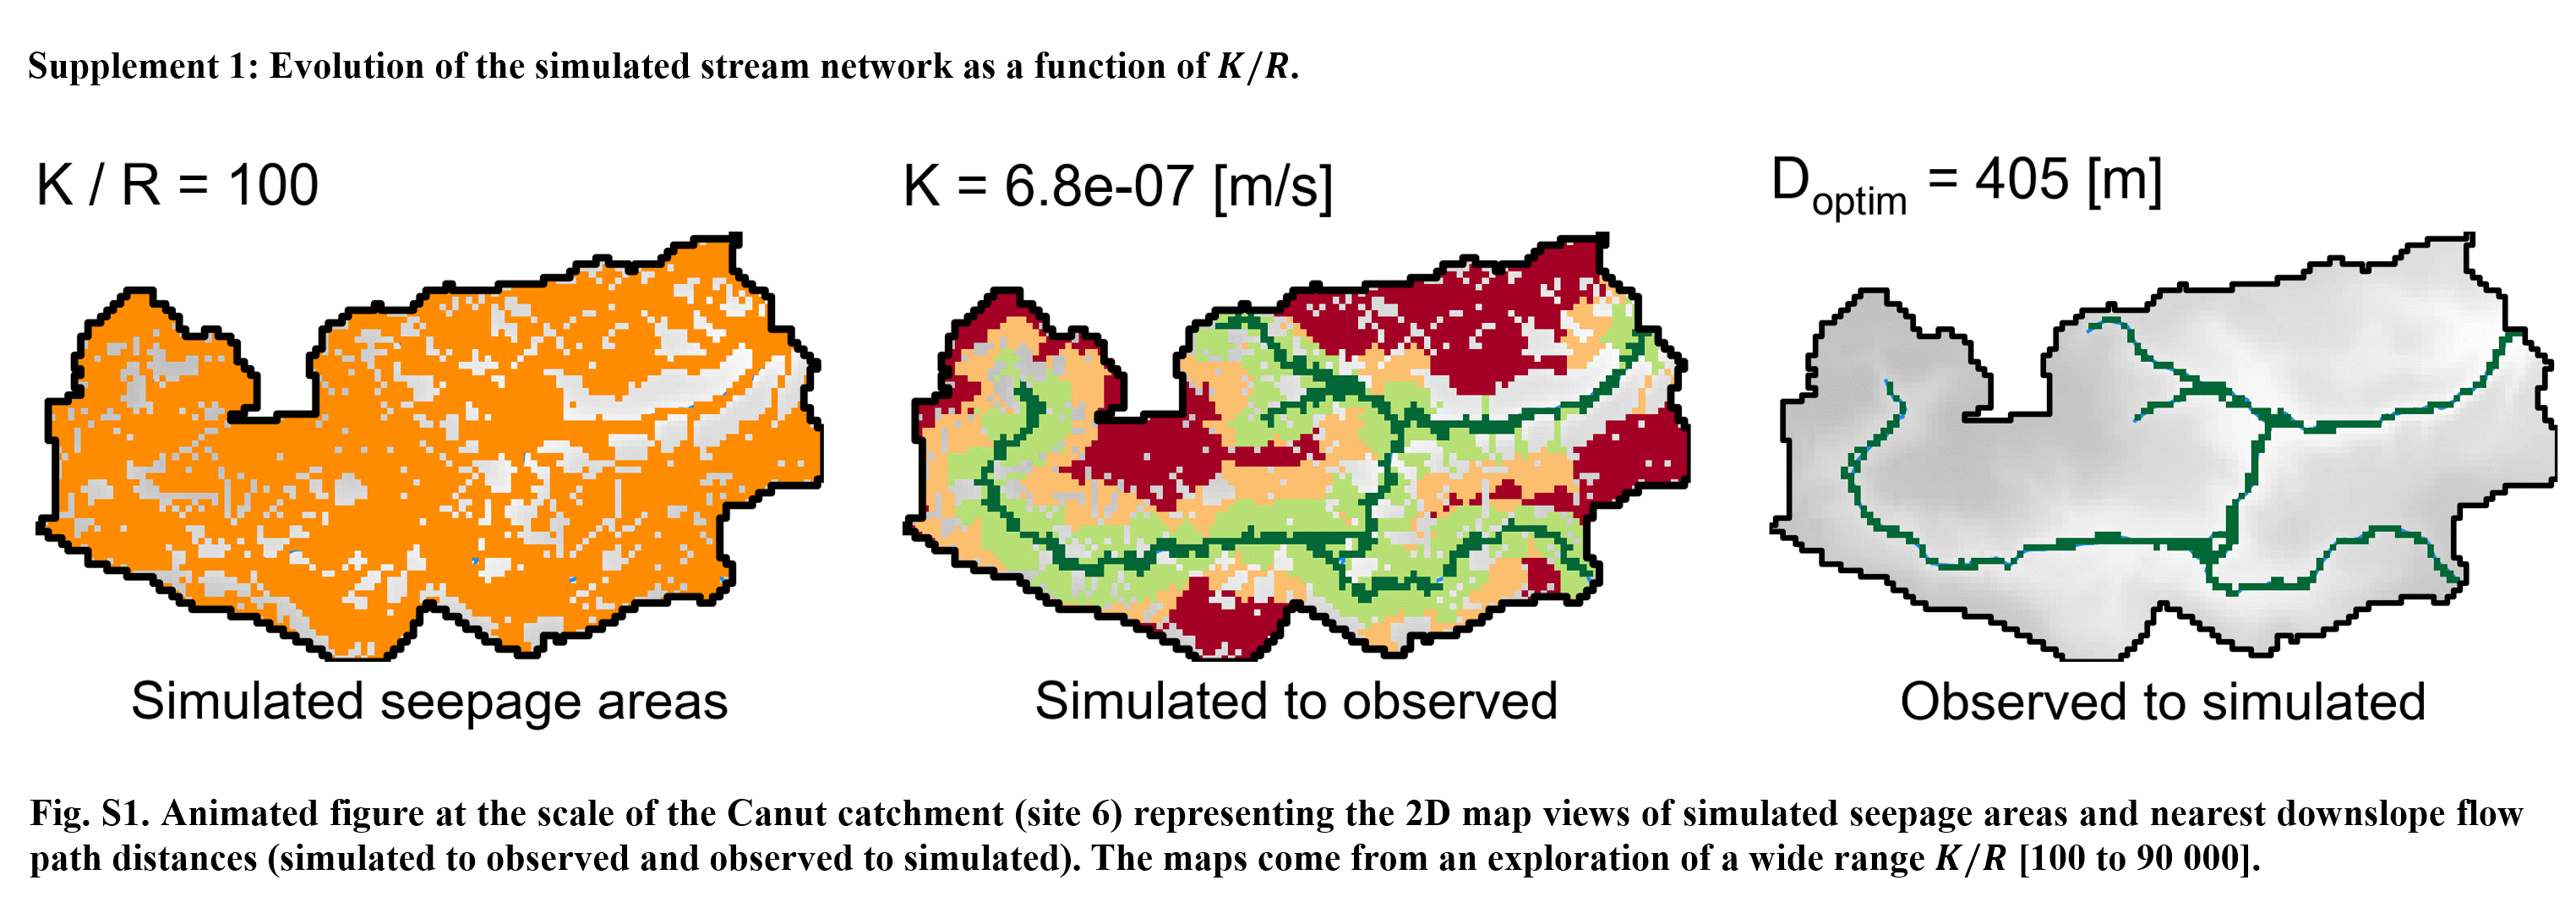

Supplement: Supplementary file 1 [file hess-27-3221-2023-supplement.zip › Supplement_1.gif]
